# Supplementary material for: Applying a network framework to the neurobiology of reading and dyslexia
Source: J Neurodev Disord. 2018 Dec 13;10:37. doi: 10.1186/s11689-018-9251-z (PMC6291929; doi:10.1186/s11689-018-9251-z)
Supplement: Supplementary file 1 — Details for 264 nodes used in graph theory analyses. Table of node coordinates, community assignments, network measures and implication in the three dyslexia meta-analyses. Atlas labels were assigned using the Talaraich Daemon atlas. (CSV 20 kb) [file 11689_2018_9251_MOESM1_ESM.csv]

ROI_Power2013	ROI_Power2011	X	Y	Z	Participation_Coefficient	Community_Density	In_Dyslexia	In_Maisog2008	In_Richlan2009	In_Paulesu2014	MasterAssignment_Power2011	SuggestedSystem_Power2011	Labels_TT_Daemon
222	1	-25	-98	-12	0.0	11.2	0	0	0	0	-1	Uncertain	L lingual gyrus, L BA 18
147	2	27	-97	-13	0.0	7.8	0	0	0	0	-1	Uncertain	R lingual gyrus, R BA 18
256	3	24	32	-18	0.0	8.2	0	0	0	0	-1	Uncertain	R middle frontal gyrus
261	4	-56	-45	-24	0.0	4.8	1	1	0	0	-1	Uncertain	L inferior temporal gyrus, L BA 37
225	5	8	41	-24	0.0	7.7	0	0	0	0	-1	Uncertain	R orbital gyrus
130	6	-21	-22	-20	0.0	8.0	0	0	0	0	-1	Uncertain	L parahippocampal gyrus, L BA 35
136	7	17	-28	-17	0.0	8.5	0	0	0	0	-1	Uncertain	R culmen
260	8	-37	-29	-26	0.0	7.9	1	0	1	0	-1	Uncertain	L parahippocampal gyrus
132	9	65	-24	-19	0.0	8.7	0	0	0	0	-1	Uncertain	R inferior temporal gyrus, R BA 20
263	10	52	-34	-27	0.0	4.1	1	1	0	0	-1	Uncertain	R fusiform gyrus
264	11	55	-31	-17	0.0	9.0	0	0	0	0	-1	Uncertain	R middle temporal gyrus
2	18	-7	-33	72	0.0	5.3	0	0	0	0	1	Sensory/somatomotor Hand	L paracentral lobule
3	19	13	-33	75	0.0	5.4	0	0	0	0	1	Sensory/somatomotor Hand	R precentral gyrus
6	31	10	-17	74	0.0	5.3	0	0	0	0	1	Sensory/somatomotor Hand	R medial frontal gyrus
9	39	2	-28	60	0.0	8.4	0	0	0	0	1	Sensory/somatomotor Hand	R medial frontal gyrus, R BA 6
122	75	6	67	-4	0.0	9.4	0	0	0	0	5	Default mode	R superior frontal gyrus
82	76	8	48	-15	0.0	10.3	0	0	0	0	5	Default mode	R medial frontal gyrus
146	78	-18	63	-9	0.0	8.8	0	0	0	0	5	Default mode	L superior frontal gyrus, L BA 11
133	83	-68	-23	-16	0.0	7.3	0	0	0	0	5	Default mode	L middle temporal gyrus
134	84	-58	-26	-15	0.0	7.4	0	0	0	0	-1	Uncertain	L middle temporal gyrus, L BA 21
105	104	-20	45	39	0.0	7.6	0	0	0	0	5	Default mode	L superior frontal gyrus, L BA 9
90	106	6	64	22	0.0	4.9	0	0	0	0	5	Default mode	R medial frontal gyrus, R BA 10
84	116	65	-12	-19	0.0	8.0	0	0	0	0	5	Default mode	R inferior temporal gyrus, R BA 21
141	132	-31	19	-19	0.0	12.7	0	0	0	0	-1	Uncertain	L inferior frontal gyrus
221	141	17	-91	-14	0.0	7.8	0	0	0	0	-1	Uncertain	R inferior occipital gyrus
196	151	-15	-72	-8	0.0	3.9	0	0	0	0	7	Visual	L lingual gyrus
201	158	20	-86	-2	0.0	4.7	0	0	0	0	7	Visual	R lingual gyrus, R BA 17
202	159	15	-77	31	0.0	8.6	0	0	0	0	7	Visual	R cuneus, R BA 7
210	165	26	-79	-16	0.0	6.3	0	0	0	0	7	Visual	R lingual gyrus, R BA 18
252	181	34	54	-13	0.0	8.0	0	0	0	0	8	Fronto-parietal Task Control	R middle frontal gyrus
167	226	-5	-28	-4	0.0	0.0	0	0	0	0	10	Subcortical	L thalamus
186	247	33	-12	-34	0.0	6.7	0	0	0	0	-1	Uncertain	R uncus
188	250	-50	-7	-39	0.0	5.1	0	0	0	0	-1	Uncertain	L inferior temporal gyrus
1	264	-7	-21	65	0.0	5.7	0	0	0	0	1	Sensory/somatomotor Hand	L medial frontal gyrus
193	148	20	-66	2	0.04	4.3	0	0	0	0	7	Visual	R lingual gyrus
208	170	6	-81	6	0.06	4.2	0	0	0	0	7	Visual	R cuneus
219	172	-33	-79	-13	0.06	8.5	0	0	0	0	7	Visual	L middle occipital gyrus
72	89	6	-59	35	0.08	4.3	0	0	0	0	5	Default mode	R precuneus
108	114	-20	64	19	0.09	6.6	0	0	0	0	5	Default mode	L superior frontal gyrus, L BA 10
16	37	-38	-15	69	0.1	4.9	0	0	0	0	1	Sensory/somatomotor Hand	L precentral gyrus
207	167	-3	-81	21	0.12	5.3	1	1	0	0	7	Visual	L cuneus, L BA 18
7	34	-21	-31	61	0.13	5.6	0	0	0	0	1	Sensory/somatomotor Hand	L postcentral gyrus, L BA 3
13	27	-38	-27	69	0.14	3.8	0	0	0	0	1	Sensory/somatomotor Hand	L precentral gyrus
5	28	20	-29	60	0.15	5.8	0	0	0	0	1	Sensory/somatomotor Hand	R precentral gyrus, R BA 4
8	35	-13	-17	75	0.15	5.3	0	0	0	0	1	Sensory/somatomotor Hand	L superior frontal gyrus
15	36	42	-20	55	0.15	5.2	1	0	0	1	1	Sensory/somatomotor Hand	R postcentral gyrus, R BA 3
4	23	-23	-30	72	0.18	4.2	0	0	0	0	1	Sensory/somatomotor Hand	L precentral gyrus
10	40	3	-17	58	0.18	5.6	0	0	0	0	1	Sensory/somatomotor Hand	R medial frontal gyrus, R BA 6
190	145	8	-72	11	0.19	5.3	0	0	0	0	7	Visual	R cuneus
98	86	-44	-65	35	0.2	4.1	0	0	0	0	5	Default mode	L angular gyrus
12	24	-40	-19	54	0.21	6.6	1	0	1	0	1	Sensory/somatomotor Hand	L precentral gyrus
103	102	13	55	38	0.21	5.2	0	0	0	0	5	Default mode	R superior frontal gyrus
93	109	-3	44	-9	0.21	6.0	0	0	0	0	5	Default mode	L medial frontal gyrus, L BA 11
191	146	-8	-81	7	0.22	3.8	0	0	0	0	7	Visual	L cuneus
128	82	46	16	-30	0.23	12.1	0	0	0	0	5	Default mode	R superior temporal gyrus, R BA 38
89	105	6	54	16	0.23	4.6	0	0	0	0	5	Default mode	R medial frontal gyrus
11	21	29	-17	71	0.24	4.4	0	0	0	0	1	Sensory/somatomotor Hand	R precentral gyrus
126	81	-44	12	-34	0.24	10.5	0	0	0	0	5	Default mode	L superior temporal gyrus, L BA 38
168	227	-22	7	-5	0.25	0.0	0	0	0	0	10	Subcortical	L lentiform nucleus, L putamen
92	108	9	54	3	0.26	7.1	0	0	0	0	5	Default mode	R medial frontal gyrus, R BA 10
77	95	11	-54	17	0.28	7.8	0	0	0	0	5	Default mode	R posterior cingulate
47	42	-49	-11	35	0.29	9.8	0	0	0	0	2	Sensory/somatomotor Mouth	L precentral gyrus
213	168	-40	-88	-6	0.29	7.7	0	0	0	0	7	Visual	L inferior occipital gyrus
215	171	-26	-90	3	0.3	5.8	0	0	0	0	7	Visual	L middle occipital gyrus, L BA 19
199	156	15	-87	37	0.31	5.2	0	0	0	0	7	Visual	R precuneus, R BA 19
198	155	-14	-91	31	0.32	3.9	0	0	0	0	7	Visual	L cuneus, L BA 19
203	160	-16	-52	-1	0.32	6.9	0	0	0	0	7	Visual	L lingual gyrus
81	74	-41	-75	26	0.33	14.9	0	0	0	0	5	Default mode	L middle temporal gyrus
24	14	-14	-18	40	0.36	15.5	0	0	0	0	1	Sensory/somatomotor Hand	L cingulate gyrus, L BA 24
197	152	-18	-68	5	0.36	4.8	0	0	0	0	7	Visual	L cuneus
187	248	-31	-10	-36	0.36	7.8	0	0	0	0	-1	Uncertain	L uncus, L BA 20
97	115	-8	48	23	0.37	4.9	0	0	0	0	5	Default mode	L medial frontal gyrus
91	107	-7	51	-1	0.4	6.3	0	0	0	0	5	Default mode	L medial frontal gyrus, L BA 10
144	249	49	-3	-38	0.4	7.4	0	0	0	0	-1	Uncertain	R inferior temporal gyrus, R BA 20
195	150	27	-59	-9	0.43	5.3	0	0	0	0	7	Visual	R parahippocampal gyrus
17	41	38	-17	45	0.44	10.5	0	0	0	0	1	Sensory/somatomotor Hand	R precentral gyrus
48	44	51	-6	32	0.46	12.7	0	0	0	0	2	Sensory/somatomotor Mouth	R precentral gyrus, R BA 6
101	99	-16	29	53	0.46	6.6	0	0	0	0	5	Default mode	L superior frontal gyrus
140	85	27	16	-17	0.47	10.5	0	0	0	0	-1	Uncertain	R inferior frontal gyrus
71	88	-7	-55	27	0.47	5.3	0	0	0	0	5	Default mode	L cingulate gyrus
87	79	-46	-61	21	0.48	9.6	0	0	0	0	5	Default mode	L middle temporal gyrus, L BA 39
75	92	8	-48	31	0.51	4.3	0	0	0	0	5	Default mode	R cingulate gyrus, R BA 31
22	38	-16	-46	73	0.52	9.3	0	0	0	0	1	Sensory/somatomotor Hand	L postcentral gyrus
220	140	8	-91	-7	0.53	7.9	0	0	0	0	-1	Uncertain	R lingual gyrus
106	121	13	30	59	0.56	8.0	0	0	0	0	5	Default mode	R superior frontal gyrus, R BA 6
127	128	52	7	-30	0.61	11.5	0	0	0	0	5	Default mode	R middle temporal gyrus, R BA 21
131	136	4	-48	51	0.61	13.1	0	0	0	0	6	Memory retrieval?	R precuneus, R BA 7
184	245	22	-58	-23	0.61	0.0	0	0	0	0	13	Cerebellar	R declive
204	162	24	-87	24	0.62	4.2	0	0	0	0	7	Visual	R cuneus
129	129	-53	3	-27	0.64	9.2	0	0	0	0	5	Default mode	L middle temporal gyrus
194	149	-24	-91	19	0.64	4.5	0	0	0	0	7	Visual	L cuneus
112	124	-26	-40	-8	0.65	15.7	0	0	0	0	5	Default mode	L parahippocampal gyrus
104	103	-10	55	39	0.66	3.8	0	0	0	0	5	Default mode	L superior frontal gyrus, L BA 9
73	90	-11	-56	16	0.73	8.9	0	0	0	0	5	Default mode	L posterior cingulate
145	12	34	38	-12	0.81	10.6	0	0	0	0	-1	Uncertain	R middle frontal gyrus, R BA 11
74	91	-3	-49	13	0.84	7.4	0	0	0	0	5	Default mode	L posterior cingulate, L BA 30
185	246	1	-62	-18	0.85	0.0	0	0	0	0	13	Cerebellar	R declive
109	117	-56	-13	-10	0.86	11.7	0	0	0	0	5	Default mode	L middle temporal gyrus
211	153	43	-78	-12	0.91	6.8	0	0	0	0	7	Visual	R inferior occipital gyrus, R BA 19
124	127	28	-77	-32	0.92	0.0	0	0	0	0	5	Default mode	R uvula
209	143	18	-47	-10	0.92	9.8	0	0	0	0	7	Visual	R parahippocampal gyrus, R BA 19
206	166	-16	-77	34	0.92	13.1	0	0	0	0	7	Visual	L precuneus
76	93	15	-63	26	0.93	9.1	0	0	0	0	5	Default mode	R precuneus, R BA 31
216	173	37	-81	1	0.95	4.3	0	0	0	0	7	Visual	R middle occipital gyrus
38	64	-38	-33	17	0.96	6.3	0	0	0	0	4	Auditory	L superior temporal gyrus, L BA 41
30	26	50	-20	42	0.98	10.1	0	0	0	0	1	Sensory/somatomotor Hand	R postcentral gyrus, R BA 3
49	45	-53	-10	24	0.99	10.5	0	0	0	0	2	Sensory/somatomotor Mouth	L precentral gyrus
164	222	6	-24	0	0.99	0.0	0	0	0	0	10	Subcortical	R thalamus
223	142	-12	-95	-13	1.0	10.8	1	0	1	0	-1	Uncertain	L lingual gyrus, L BA 17
229	175	48	25	27	1.0	9.0	0	0	0	0	8	Fronto-parietal Task Control	R middle frontal gyrus
50	46	66	-8	25	1.02	8.6	0	0	0	0	2	Sensory/somatomotor Mouth	R precentral gyrus
79	97	23	33	48	1.02	6.2	0	0	0	0	5	Default mode	R superior frontal gyrus, R BA 8
80	101	22	39	39	1.02	12.1	0	0	0	0	5	Default mode	R superior frontal gyrus, R BA 9
254	180	24	45	-15	1.04	8.6	0	0	0	0	8	Fronto-parietal Task Control	R superior frontal gyrus, R BA 11
100	98	-10	39	52	1.13	5.4	0	0	0	0	5	Default mode	L superior frontal gyrus
94	110	8	42	-5	1.13	7.1	0	0	0	0	5	Default mode	R anterior cingulate, R BA 10
113	125	27	-37	-13	1.17	15.3	0	0	0	0	5	Default mode	R parahippocampal gyrus
189	144	40	-72	14	1.26	9.7	0	0	0	0	7	Visual	R middle temporal gyrus
85	119	65	-31	-9	1.42	11.7	0	0	0	0	5	Default mode	R middle temporal gyrus
19	25	29	-39	59	1.43	9.1	0	0	0	0	1	Sensory/somatomotor Hand	R postcentral gyrus
181	243	-16	-65	-20	1.43	0.0	0	0	0	0	13	Cerebellar	L declive
78	96	52	-59	36	1.44	6.2	0	0	0	0	5	Default mode	R angular gyrus
29	20	-54	-23	43	1.47	8.3	0	0	0	0	1	Sensory/somatomotor Hand	L postcentral gyrus
107	94	-2	-37	44	1.47	13.3	0	0	0	0	5	Default mode	L cingulate gyrus, L BA 31
40	66	-49	-26	5	1.49	10.6	1	0	1	0	4	Auditory	L superior temporal gyrus, L BA 41
110	123	52	-2	-16	1.49	13.3	0	0	0	0	5	Default mode	R middle temporal gyrus
88	80	43	-72	28	1.52	16.6	0	0	0	0	5	Default mode	R middle temporal gyrus
99	87	-39	-75	44	1.55	7.3	0	0	0	0	5	Default mode	L superior parietal lobule
36	67	43	-23	20	1.56	9.6	0	0	0	0	4	Auditory	R insula
200	157	29	-77	25	1.59	7.3	0	0	0	0	7	Visual	R cuneus
18	22	10	-46	73	1.62	15.4	0	0	0	0	1	Sensory/somatomotor Hand	R postcentral gyrus
21	32	22	-42	69	1.64	9.1	0	0	0	0	1	Sensory/somatomotor Hand	R postcentral gyrus
86	120	-68	-41	-5	1.64	8.0	0	0	0	0	5	Default mode	L middle temporal gyrus
214	169	37	-84	13	1.65	4.9	0	0	0	0	7	Visual	R middle occipital gyrus
258	253	-47	-51	-21	1.66	11.6	1	0	1	1	-1	Uncertain	L fusiform gyrus
120	130	47	-50	29	1.68	16.1	0	0	0	0	5	Default mode	R supramarginal gyrus
135	137	-46	31	-13	1.72	10.8	0	0	0	0	5	Default mode	L inferior frontal gyrus
95	111	-11	45	8	1.76	5.3	0	0	0	0	5	Default mode	L anterior cingulate
37	63	58	-16	7	1.88	9.0	0	0	0	0	4	Auditory	R superior temporal gyrus
34	61	32	-26	13	1.93	12.0	0	0	0	0	4	Auditory	R insula, R BA 13
123	184	17	-80	-34	1.95	0.0	0	0	0	0	-1	Uncertain	R uvula
255	182	-21	41	-20	1.99	7.8	0	0	0	0	-1	Uncertain	L superior frontal gyrus, L BA 11
237	201	-42	25	30	2.01	8.5	0	0	0	0	8	Fronto-parietal Task Control	L middle frontal gyrus
165	224	-10	-18	7	2.03	0.0	1	1	0	0	10	Subcortical	L thalamus, L medial dorsal nucleus
251	179	58	-53	-14	2.04	12.3	0	0	0	0	8	Fronto-parietal Task Control	R middle temporal gyrus, R BA 37
183	244	-32	-55	-25	2.04	10.2	0	0	0	0	13	Cerebellar	L declive
217	154	-47	-76	-10	2.06	14.3	0	0	0	0	7	Visual	L middle occipital gyrus
26	51	-10	-2	42	2.11	12.8	0	0	0	0	3	Cingulo-opercular Task Control	L cingulate gyrus
42	68	-50	-34	26	2.12	14.2	1	1	0	0	4	Auditory	L inferior parietal lobule
244	192	44	-53	47	2.13	9.0	0	0	0	0	8	Fronto-parietal Task Control	R inferior parietal lobule, R BA 40
41	43	36	-9	14	2.15	13.1	0	0	0	0	2	Sensory/somatomotor Mouth	R insula
192	147	-28	-79	19	2.17	12.2	0	0	0	0	7	Visual	L middle occipital gyrus
20	30	-29	-43	61	2.22	8.5	0	0	0	0	1	Sensory/somatomotor Hand	L postcentral gyrus, L BA 5
27	16	10	-2	45	2.24	11.2	0	0	0	0	1	Sensory/somatomotor Hand	R cingulate gyrus
39	65	-60	-25	14	2.25	9.2	0	0	0	0	4	Auditory	L postcentral gyrus, L BA 40
45	71	56	-5	13	2.25	12.2	0	0	0	0	4	Auditory	R precentral gyrus
212	161	42	-66	-8	2.34	8.2	0	0	0	0	7	Visual	R middle occipital gyrus
43	69	-53	-22	23	2.35	13.4	0	0	0	0	4	Auditory	L postcentral gyrus
44	70	-55	-9	12	2.38	10.4	0	0	0	0	4	Auditory	L precentral gyrus
102	100	-35	20	51	2.55	6.1	0	0	0	0	5	Default mode	L middle frontal gyrus, L BA 8
239	191	-28	-58	48	2.62	8.6	0	0	0	0	8	Fronto-parietal Task Control	L superior parietal lobule
118	135	11	-66	42	2.63	13.6	0	0	0	0	6	Memory retrieval?	R precuneus
230	186	47	10	33	2.65	12.6	0	0	0	0	8	Fronto-parietal Task Control	R middle frontal gyrus, R BA 9
173	232	-31	-11	0	2.67	0.0	0	0	0	0	10	Subcortical	L lentiform nucleus, L putamen
231	187	-41	6	33	2.69	8.2	0	0	0	0	8	Fronto-parietal Task Control	L inferior frontal gyrus
243	190	49	-42	45	2.78	8.6	0	0	0	0	8	Fronto-parietal Task Control	R inferior parietal lobule
111	77	-13	-40	1	2.79	13.0	0	0	0	0	5	Default mode	L parahippocampal gyrus, L BA 30
64	235	54	-43	22	2.79	16.9	0	0	0	0	11	Ventral attention	R inferior parietal lobule, R BA 13
119	118	-58	-30	-4	2.83	10.4	0	0	0	0	5	Default mode	L middle temporal gyrus
53	237	-55	-40	14	2.94	10.7	1	1	1	0	11	Ventral attention	L superior temporal gyrus
32	33	-45	-32	47	2.98	9.2	1	0	0	1	1	Sensory/somatomotor Hand	L postcentral gyrus, L BA 40
242	189	38	43	15	3.0	7.7	0	0	0	0	8	Fronto-parietal Task Control	R middle frontal gyrus
14	29	44	-8	57	3.01	11.5	0	0	0	0	1	Sensory/somatomotor Hand	R precentral gyrus, R BA 6
246	177	-53	-49	43	3.07	13.7	1	0	1	1	8	Fronto-parietal Task Control	L inferior parietal lobule
115	133	-2	-35	31	3.08	8.2	0	0	0	0	6	Memory retrieval?	L cingulate gyrus, L BA 31
139	139	49	35	-12	3.14	14.0	0	0	0	0	5	Default mode	R inferior frontal gyrus
166	225	12	-17	8	3.16	0.0	1	1	0	0	10	Subcortical	R thalamus
28	49	19	-8	64	3.17	13.3	0	0	0	0	3	Cingulo-opercular Task Control	R middle frontal gyrus, R BA 6
169	228	-15	4	8	3.2	0.0	1	0	1	1	10	Subcortical	L lentiform nucleus, L putamen
240	178	-23	11	64	3.27	17.5	0	0	0	0	8	Fronto-parietal Task Control	L middle frontal gyrus
35	62	65	-33	20	3.28	11.0	0	0	0	0	4	Auditory	R superior temporal gyrus, R BA 42
235	198	-42	45	-2	3.33	11.1	0	0	0	0	8	Fronto-parietal Task Control	L middle frontal gyrus
232	188	-42	38	21	3.35	7.7	0	0	0	0	8	Fronto-parietal Task Control	L middle frontal gyrus, L BA 46
52	47	-3	2	53	3.36	9.5	1	0	0	1	3	Cingulo-opercular Task Control	L medial frontal gyrus
83	112	-2	38	36	3.36	8.6	0	0	0	0	5	Default mode	L medial frontal gyrus, L BA 9
137	131	-49	-42	1	3.36	12.7	0	0	0	0	5	Default mode	L middle temporal gyrus
25	15	0	-15	47	3.39	14.6	0	0	0	0	1	Sensory/somatomotor Hand	L paracentral lobule
114	126	-34	-38	-16	3.39	17.4	0	0	0	0	5	Default mode	L fusiform gyrus, L BA 37
171	230	23	10	1	3.39	0.0	0	0	0	0	10	Subcortical	R lentiform nucleus, R putamen
125	185	35	-67	-34	3.4	0.0	0	0	0	0	-1	Uncertain	R uvula
249	199	33	-53	44	3.4	10.8	0	0	0	0	8	Fronto-parietal Task Control	R inferior parietal lobule
55	53	13	-1	70	3.42	8.6	0	0	0	0	3	Cingulo-opercular Task Control	R superior frontal gyrus
179	241	53	33	1	3.44	15.1	0	0	0	0	11	Ventral attention	R inferior frontal gyrus
117	134	-7	-71	42	3.45	14.5	0	0	0	0	6	Memory retrieval?	L precuneus, L BA 7
61	58	-51	8	-2	3.46	11.6	0	0	0	0	3	Cingulo-opercular Task Control	L superior temporal gyrus, L BA 22
65	240	56	-46	11	3.46	12.8	0	0	0	0	11	Ventral attention	R superior temporal gyrus
155	214	-28	52	21	3.5	10.8	0	0	0	0	9	Salience	L superior frontal gyrus
158	219	26	50	27	3.5	9.6	0	0	0	0	9	Salience	R superior frontal gyrus, R BA 10
176	223	-2	-13	12	3.51	0.0	1	0	1	0	10	Subcortical	L thalamus
182	183	-18	-76	-24	3.58	0.0	0	0	0	0	-1	Uncertain	L declive
96	113	-3	42	16	3.59	6.7	0	0	0	0	5	Default mode	L anterior cingulate, L BA 32
174	233	15	5	7	3.61	0.0	0	0	0	0	10	Subcortical	R lentiform nucleus, R putamen
156	206	31	33	26	3.63	14.4	1	0	1	0	9	Salience	R middle frontal gyrus
59	238	52	-33	8	3.63	10.5	0	0	0	0	11	Ventral attention	R superior temporal gyrus
152	210	37	32	-2	3.71	15.4	0	0	0	0	9	Salience	R inferior frontal gyrus
205	163	6	-72	24	3.72	8.9	0	0	0	0	7	Visual	R precuneus
228	220	-39	51	17	3.72	11.9	0	0	0	0	9	Salience	L middle frontal gyrus, L BA 10
236	200	43	49	-2	3.73	13.2	0	0	0	0	8	Fronto-parietal Task Control	R middle frontal gyrus
233	176	-47	11	23	3.74	12.2	0	0	0	0	8	Fronto-parietal Task Control	L inferior frontal gyrus
69	254	46	-47	-17	3.78	12.8	0	0	0	0	-1	Uncertain	R fusiform gyrus
70	205	42	0	47	3.8	15.4	0	0	0	0	9	Salience	R middle frontal gyrus, R BA 6
163	217	10	22	27	3.8	11.8	0	0	0	0	9	Salience	R anterior cingulate
46	72	59	-17	29	3.86	12.9	1	0	1	0	4	Auditory	R postcentral gyrus, R BA 3
253	174	-44	2	46	3.89	17.5	1	0	0	1	8	Fronto-parietal Task Control	L middle frontal gyrus
234	197	-34	55	4	3.9	11.8	0	0	0	0	8	Fronto-parietal Task Control	L middle frontal gyrus, L BA 10
116	221	2	-24	30	3.9	6.6	0	0	0	0	6	Memory retrieval?	R cingulate gyrus
57	13	-7	-52	61	3.91	14.8	0	0	0	0	1	Sensory/somatomotor Hand	L precuneus, L BA 7
178	207	48	22	10	3.92	14.7	0	0	0	0	9	Salience	R inferior frontal gyrus, R BA 45
262	251	10	-62	61	3.92	14.7	0	0	0	0	12	Dorsal attention	R precuneus, R BA 7
54	73	-30	-27	12	3.97	9.8	0	0	0	0	4	Auditory	L insula
247	194	37	-65	40	3.99	12.4	0	0	0	0	8	Fronto-parietal Task Control	R inferior parietal lobule
157	218	31	56	14	3.99	13.7	0	0	0	0	9	Salience	R middle frontal gyrus
160	59	-5	18	34	4.06	8.9	0	0	0	0	3	Cingulo-opercular Task Control	L cingulate gyrus
23	50	-16	-5	71	4.07	11.6	0	0	0	0	3	Cingulo-opercular Task Control	L superior frontal gyrus
154	211	34	16	-8	4.08	15.2	0	0	0	0	9	Salience	R inferior frontal gyrus
153	213	-1	15	44	4.08	9.4	0	0	0	0	9	Salience	L cingulate gyrus
175	234	9	-4	6	4.09	0.0	0	0	0	0	10	Subcortical	R thalamus, R ventral anterior nucleus
33	48	54	-28	34	4.13	12.7	1	1	0	0	3	Cingulo-opercular Task Control	R inferior parietal lobule, R BA 2
51	55	-45	0	9	4.16	11.5	0	0	0	0	3	Cingulo-opercular Task Control	L precentral gyrus, L BA 44
248	195	-42	-55	45	4.17	8.4	0	0	0	0	8	Fronto-parietal Task Control	L inferior parietal lobule, L BA 40
172	231	29	1	4	4.19	0.0	0	0	0	0	10	Subcortical	R lentiform nucleus, R putamen
63	236	-56	-50	10	4.28	16.5	1	0	1	0	11	Ventral attention	L superior temporal gyrus
60	56	49	8	-1	4.34	9.7	0	0	0	0	3	Cingulo-opercular Task Control	R superior temporal gyrus
67	52	37	1	-4	4.36	10.4	0	0	0	0	3	Cingulo-opercular Task Control	R insula
62	54	7	8	51	4.36	11.6	0	0	0	0	3	Cingulo-opercular Task Control	R medial frontal gyrus, R BA 32
218	164	-42	-74	0	4.36	8.3	0	0	0	0	7	Visual	L middle occipital gyrus
159	212	-11	26	25	4.46	10.9	0	0	0	0	9	Salience	L anterior cingulate
259	261	-32	-1	54	4.46	18.7	0	0	0	0	12	Dorsal attention	L middle frontal gyrus, L BA 6
250	204	55	-45	37	4.47	13.4	0	0	0	0	9	Salience	R supramarginal gyrus
245	193	32	14	56	4.48	10.9	0	0	0	0	8	Fronto-parietal Task Control	R superior frontal gyrus
162	216	5	23	37	4.48	13.3	1	0	0	1	9	Salience	R cingulate gyrus, R BA 32
238	260	-27	-71	37	4.48	16.2	0	0	0	0	12	Dorsal attention	L precuneus
142	239	51	-29	-4	4.5	12.0	1	1	0	0	11	Ventral attention	R middle temporal gyrus, R BA 21
170	229	31	-14	2	4.57	12.5	0	0	0	0	10	Subcortical	R lentiform nucleus, R putamen
241	202	-3	26	44	4.58	13.2	0	0	0	0	8	Fronto-parietal Task Control	L medial frontal gyrus, L BA 8
149	60	36	10	1	4.7	6.0	0	0	0	0	3	Cingulo-opercular Task Control	R insula
143	196	40	18	40	4.79	9.9	0	0	0	0	8	Fronto-parietal Task Control	R precentral gyrus
66	252	-52	-63	5	4.84	14.3	1	0	0	1	12	Dorsal attention	L middle temporal gyrus
138	138	-10	11	67	4.86	14.7	0	0	0	0	11	Ventral attention	L superior frontal gyrus
121	122	12	36	20	4.88	10.1	0	0	0	0	5	Default mode	R anterior cingulate, R BA 32
161	215	0	30	27	4.88	10.3	0	0	0	0	9	Salience	L anterior cingulate
177	203	11	-39	50	4.93	15.3	0	0	0	0	9	Salience	R paracentral lobule, R BA 5
148	57	-34	3	4	5.04	9.8	0	0	0	0	3	Cingulo-opercular Task Control	L claustrum
180	242	-49	25	-1	5.07	12.9	1	0	1	0	11	Ventral attention	L inferior frontal gyrus, L BA 47
31	255	47	-30	49	5.28	10.4	1	0	0	1	1	Sensory/somatomotor Hand	R postcentral gyrus
257	259	-33	-46	47	5.32	9.1	0	0	0	0	12	Dorsal attention	L inferior parietal lobule
227	262	-42	-60	-9	5.35	12.3	1	1	1	1	12	Dorsal attention	L middle occipital gyrus
151	209	36	22	3	5.38	11.7	1	1	0	0	9	Salience	R insula, R BA 13
150	208	-35	20	0	5.46	16.4	1	1	1	0	9	Salience	L insula, L BA 47
58	263	-17	-59	64	5.67	7.5	1	0	0	1	12	Dorsal attention	L superior parietal lobule, L BA 7
224	258	25	-58	60	5.76	10.2	0	0	0	0	12	Dorsal attention	R superior parietal lobule, R BA 7
68	257	46	-59	4	5.78	13.9	0	0	0	0	12	Dorsal attention	R middle temporal gyrus
226	256	22	-65	48	5.79	15.6	0	0	0	0	12	Dorsal attention	R precuneus
56	264	29	-5	54	5.93	13.2	0	0	0	0	12	Dorsal attention	R middle frontal gyrus
